# Supplementary material for: Complementary and alternative medicine use and its association with quality of life among Lebanese breast cancer patients: a cross-sectional study
Source: Springer Nature journal article supplement (doi:10.1186/s12906-015-0969-9), 2015-12-01
Supplement: MOESM2 [file 9755910]

09 JUL 2014

RECEIVED

## استمارة

# لأثبات فعالية قائمة جودة الحياة لمرضى سرطان الثدي (FACT-B)

تستغرق مدة المقابلة 5-7 دقائق  
وتتناول العوارض التي يمكن أن تواجه المرأة وتؤثر  
على جودة حياتها من جراء الإصابة بسرطان الثدي

Institutional Review Board  
American University of Beirut

23 JUL 2014

APPROVED

رقم الاستمارة: /\_\_\_/\_\_\_/

التاريخ: \_\_\_/\_\_\_/\_\_\_

**أستمارة قائمة جودة الحياة لمرضى سرطان الثدي (FACT-B)**

ما يلي قائمة جمل تعتبرها بعض النساء ممن يعانين مرضك أنها مهمة  
الرجاء وضع دائرة حول الرقم الذي يشير الى جوابك بحيث يعكس حالتك خلال الأيام السبعة الماضية.

|                                                                                                                                                                                                                 |        | <u>الصحة الجسدية</u>             |        |       |                                                   |       |     |  |
|-----------------------------------------------------------------------------------------------------------------------------------------------------------------------------------------------------------------|--------|----------------------------------|--------|-------|---------------------------------------------------|-------|-----|--|
| كثيراً جداً                                                                                                                                                                                                     | كثيراً | نوعاً ما                         | قليلاً | أبداً |                                                   |       |     |  |
| 4                                                                                                                                                                                                               | 3      | 2                                | 1      | 0     | لدي نقص بالطاقة (نشاط)                            | QOL1  | .1  |  |
| 4                                                                                                                                                                                                               | 3      | 2                                | 1      | 0     | لدي لعيان نفس/غثيان                               | QOL2  | .2  |  |
| 4                                                                                                                                                                                                               | 3      | 2                                | 1      | 0     | بسبب وضعي الجسدي، لدي صعوبة في تلبية حاجات عائلتي | QOL3  | .3  |  |
| 4                                                                                                                                                                                                               | 3      | 2                                | 1      | 0     | لدي وجع/آلم                                       | QOL4  | .4  |  |
| 4                                                                                                                                                                                                               | 3      | 2                                | 1      | 0     | اني منزعة من الاعراض الجانبية للعلاج              | QOL5  | .5  |  |
| 4                                                                                                                                                                                                               | 3      | 2                                | 1      | 0     | أشعر أنني مريضة                                   | QOL6  | .6  |  |
| 4                                                                                                                                                                                                               | 3      | 2                                | 1      | 0     | اني مجبرة على تمضية وقت في السرير                 | QOL7  | .7  |  |
|                                                                                                                                                                                                                 |        | <u>الصحة الاجتماعية/العائلية</u> |        |       |                                                   |       |     |  |
| كثيراً جداً                                                                                                                                                                                                     | كثيراً | نوعاً ما                         | قليلاً | أبداً |                                                   |       |     |  |
| 4                                                                                                                                                                                                               | 3      | 2                                | 1      | 0     | أشعر بأنني قريبة من أصدقائي                       | QOL8  | .8  |  |
| 4                                                                                                                                                                                                               | 3      | 2                                | 1      | 0     | أحصل على دعم عاطفي من عائلتي                      | QOL9  | .9  |  |
| 4                                                                                                                                                                                                               | 3      | 2                                | 1      | 0     | أحصل على دعم من أصدقائي                           | QOL10 | .10 |  |
| 4                                                                                                                                                                                                               | 3      | 2                                | 1      | 0     | عائلتي قد تقبلت مرضي                              | QOL11 | .11 |  |
| 4                                                                                                                                                                                                               | 3      | 2                                | 1      | 0     | اني راضية عن التواصل العائلي بالنسبة الى مرضي     | QOL12 | .12 |  |
| 4                                                                                                                                                                                                               | 3      | 2                                | 1      | 0     | أشعر بالقرب من شريكي (او الداعم الاساسي لي)       | QOL13 | .13 |  |
| <p>بغض النظر عن مستوى نشاطك الجنسي الحالي، الرجاء الاجابة على السؤال التالي. ان كنت تفضلين عدم الاجابة، الرجاء وضع الإشارة علامة الإشارة في هذا المربع <input type="checkbox"/> والانتقال الى الجزء التالي.</p> |        |                                  |        |       |                                                   |       |     |  |
| 4                                                                                                                                                                                                               | 3      | 2                                | 1      | 0     | أنا راضية بحياتي الجنسية                          | QOL14 | .14 |  |

Institutional Review Board  
American University of Beirut

23 JUL 2014

APPROVED

الرجاء وضع دائرة حول الرقم الذي يشير الى جوابك بحيث يعكس حالتك خلال الأيام السبعة الماضية.

|             |        |          |        |       | <u>الصحة العاطفية</u>                            |       |     |  |
|-------------|--------|----------|--------|-------|--------------------------------------------------|-------|-----|--|
| كثيراً جداً | كثيراً | نوعاً ما | قليلاً | أبداً |                                                  |       |     |  |
| 4           | 3      | 2        | 1      | 0     | أشعر بالحزن                                      | QOL15 | .15 |  |
| 4           | 3      | 2        | 1      | 0     | اني راضية عن طريقة تأقلمي مع مرضي                | QOL16 | .16 |  |
| 4           | 3      | 2        | 1      | 0     | اني أفقد الأمل في محاربة مرضي                    | QOL17 | .17 |  |
| 4           | 3      | 2        | 1      | 0     | أشعر بالتوتر                                     | QOL18 | .18 |  |
| 4           | 3      | 2        | 1      | 0     | أنا قلقة من الموت                                | QOL19 | .19 |  |
| 4           | 3      | 2        | 1      | 0     | أنا قلقة من أن تسوء حالتي                        | QOL20 | .20 |  |
|             |        |          |        |       | <u>حالة النشاط الجسدي والوضع النفسي</u>          |       |     |  |
| كثيراً جداً | كثيراً | نوعاً ما | قليلاً | أبداً |                                                  |       |     |  |
| 4           | 3      | 2        | 1      | 0     | إني قادرة على العمل (بما يشمل عمل المنزل)        | QOL21 | .21 |  |
| 4           | 3      | 2        | 1      | 0     | عملي يشعرنني بالاكتهاء(ومن ضمنه العمل في المنزل) | QOL22 | .22 |  |
| 4           | 3      | 2        | 1      | 0     | إني قادرة على الإستمتاع بالحياة                  | QOL23 | .23 |  |
| 4           | 3      | 2        | 1      | 0     | لقد تقبلت مرضي                                   | QOL24 | .24 |  |
| 4           | 3      | 2        | 1      | 0     | إنني أنام جيداً                                  | QOL25 | .25 |  |
| 4           | 3      | 2        | 1      | 0     | أنا أستمتع بالأشياء التي أقوم بها عادة للمرح     | QOL26 | .26 |  |
| 4           | 3      | 2        | 1      | 0     | أنا راضية عن نوعية حياتي حالياً                  | QOL27 | .27 |  |

|       |        |          |        |             | <u>شؤون إضافية</u>                                |           |
|-------|--------|----------|--------|-------------|---------------------------------------------------|-----------|
| أبداً | قليلاً | نوعاً ما | كثيراً | كثيراً جداً |                                                   |           |
| 0     | 1      | 2        | 3      | 4           | أعاني ضعيفاً في التنفس                            | QOL28 .28 |
| 0     | 1      | 2        | 3      | 4           | لدي وعي ذاتي لطريقة اختيار ملابسني                | QOL29 .29 |
| 0     | 1      | 2        | 3      | 4           | احدى يدي او كلاهما متورمتان او مؤلمتان            | QOL30 .30 |
| 0     | 1      | 2        | 3      | 4           | أشعر بأنني جذابة جنسياً                           | QOL31 .31 |
| 0     | 1      | 2        | 3      | 4           | يزعجني تساقط الشعر                                | QOL32 .32 |
| 0     | 1      | 2        | 3      | 4           | أقلق لأن يصاب أحد من أفراد عائلتي بمرضني يوماً ما | QOL33 .33 |
| 0     | 1      | 2        | 3      | 4           | أقلق من تأثير الضغط/التوتر في مرضني               | QOL34 .34 |
| 0     | 1      | 2        | 3      | 4           | أنا منزعة من التغيير في الوزن                     | QOL35 .35 |
| 0     | 1      | 2        | 3      | 4           | أنا قادرة أن أشعر كمرأة                           | QOL36 .36 |
| 0     | 1      | 2        | 3      | 4           | أعاني من الألم في أجزاء محددة من جسدي             | QOL37 .37 |

Institutional Review Board  
American University of Beirut

23 JUL 2014

APPROVED
